# Supplementary material for: Self-assembled 3D flower-like perovskite PbTiO3 nanostructures and their application in the catalytic oxidation of CO
Source: Royal Society of Chemistry journal article supplement (doi:10.1039/c4ta04667f), 2014-11-05
Supplement: c4ta04667f1.pdf [file c4ta04667f1.pdf]

Supporting Information

**Self-assembled 3D flower-like Perovskite  $\text{PbTiO}_3$  nanostructures and their application in the catalytic oxidation of CO**

Gang Xu,\* Huiwen Bai, Xiaoqiang Huang, Wanbo He, Lingling Li, Ge Shen, Gaorong Han

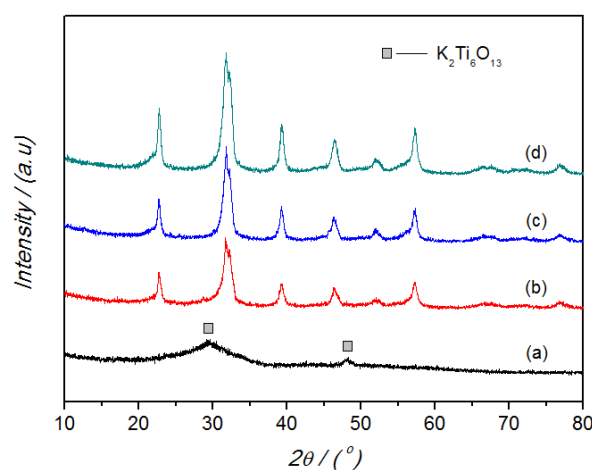

Fig. S1 XRD patterns of the samples obtained after hydrothermal treatment for different time, (a) 0.5, (b) 4, (c) 8, and (d) 16 h

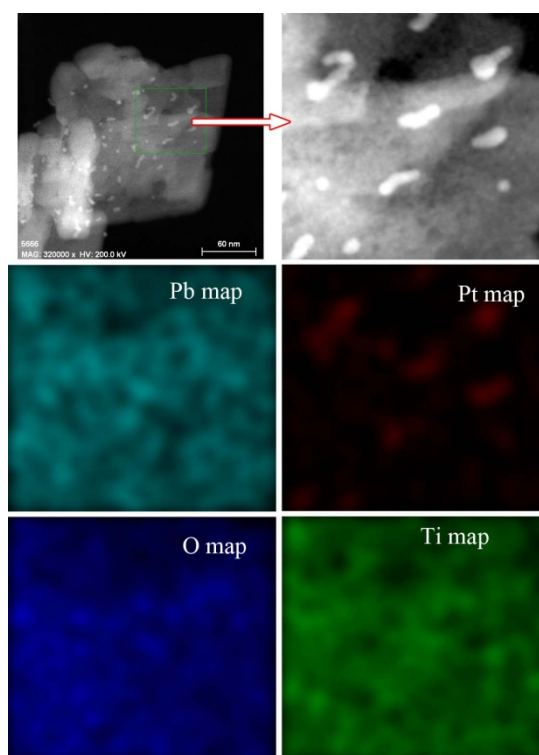

Fig. S2 STEM image of the Pt/PbTiO<sub>3</sub> nanosheet flaked away from the Pt/PbTiO<sub>3</sub> nanoflowers. The element Pb, Pt, O and Ti EDX maps were caught from the green cube area of Pt/PbTiO<sub>3</sub> nanosheet shown in the light-top STEM image. It is demonstrated that the Pt nanoparticles are well attached and dispersed on surfaces of the primary PbTiO<sub>3</sub> nanosheets, which are the primary blocks for the self-assembly of the PbTiO<sub>3</sub> nanoflowers.
